# Supplementary material
Source: Springer Nature journal article supplement (https://www.springermedizin.de/resource/supplementary/12933_2010_330_MOESM4_ESM.pdf/9538168)

# ROC Curve

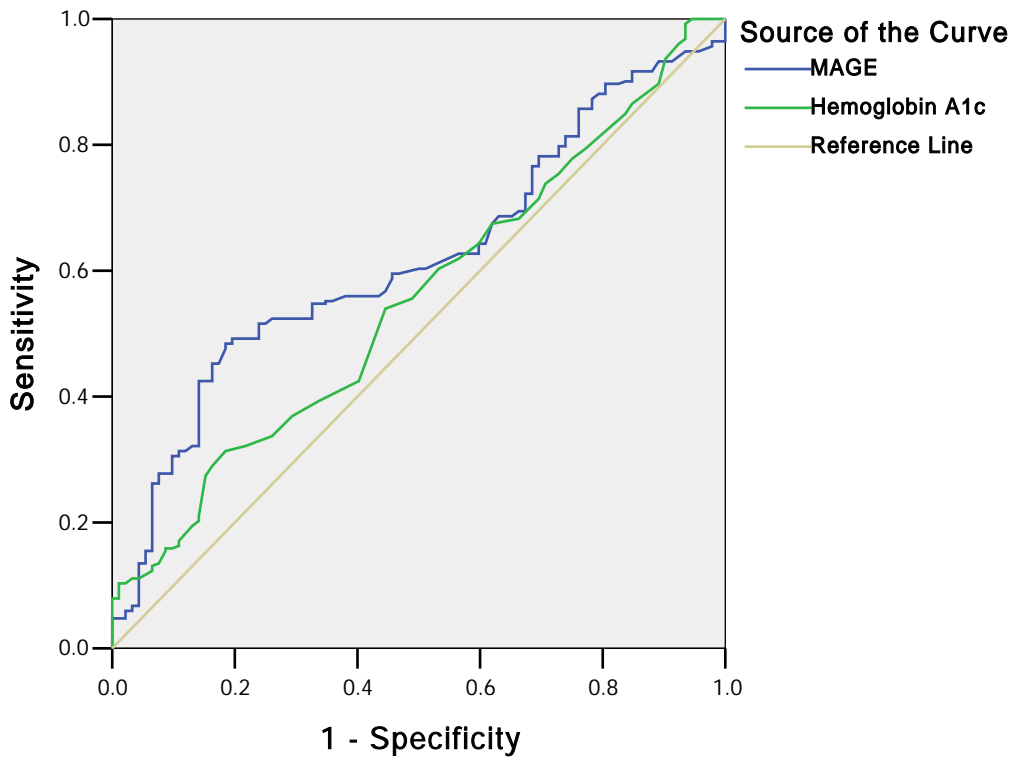

Supplement: MOESM4 [file 9538168]
